# Supplementary material for: Changes in the extracellular microenvironment and osteogenic responses of mesenchymal stem/stromal cells induced by in vitro direct electrical stimulation
Source: PubMed Central journal article supplement (PMC7894594; doi:10.1177/2041731420974147), 2021-02-16
Supplement: sj-pdf-1-tej-10.1177_2041731420974147.pdf [file sj-pdf-1-tej-10.1177_2041731420974147.pdf]

## 1 **Supplementary Materials and Methods**

### 2 *Calculation of empirical equilibrium potentials ( $E_{eq}$ )*

3 Following the total current measurement, the results were divided into 3 ranges based on the  
4 relationship between the total current and applied voltage: undetectable current; non-linear current; and  
5 linear current. Within the “undetectable current” region, it **was** assumed that there **was** no activation  
6 overpotential when applying voltage ( $E_{cell}$ ) below 1.5 V, **resulting** in  $E_{eq} = E_{cell}/2$ . Within the second and  
7 third regions, the arbitrary ratio of  $2E_{eq}/E_{cell}$ , denoted by “x”, at each applied voltage **were** approximated  
8 from the measured total current by using model parametric sweeping as shown in figure S1(a, b). The  
9 value of “1 - x” at each region **were** then plotted against applied voltage, in which the empirical  
10 coefficient for  $E_{eq}$  in function of  $E_{cell}$  **was** obtained by fitting the plotted data points, as shown in figure  
11 S1(c, d). The computed total current using the obtained empirical coefficients **were** plotted in  
12 comparison with the measured total current in figure S1(e) to confirm the consistency of the input  
13 parameters. It is noted the empirical coefficients are dimensionless.

14 **Supplementary Figures**

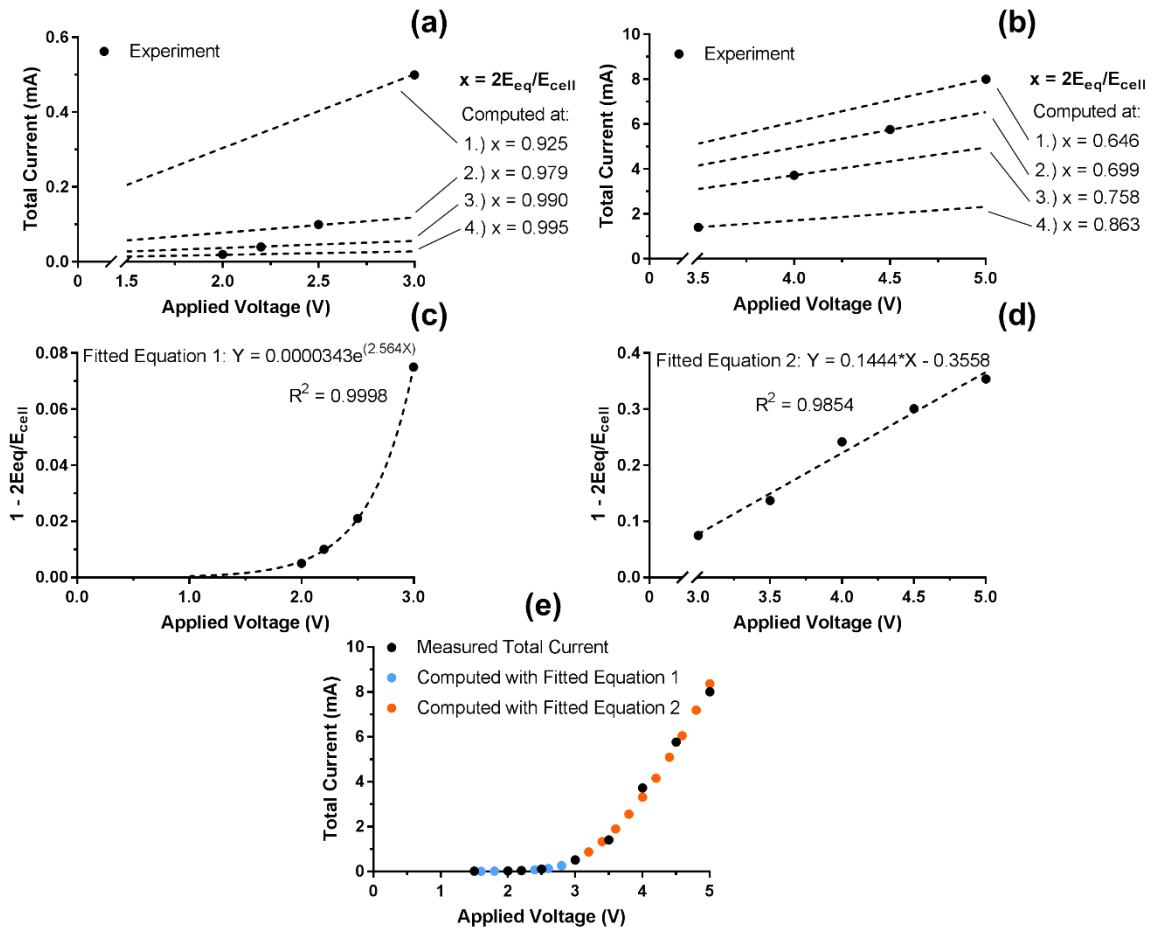

15

16 **Figure S1** (a, b) Approximation of the arbitrary ratio “x” within the non-linear and linear current regions,  
 17 respectively. (c, d) Fitted empirical equations for “1 – x” in function of the applied voltage ( $E_{cell}$ ) within  
 18 the non-linear and linear current regions, respectively. (e) Computed total current using the empirical  
 19 coefficient from the fitted equations in comparison with the measured total current.

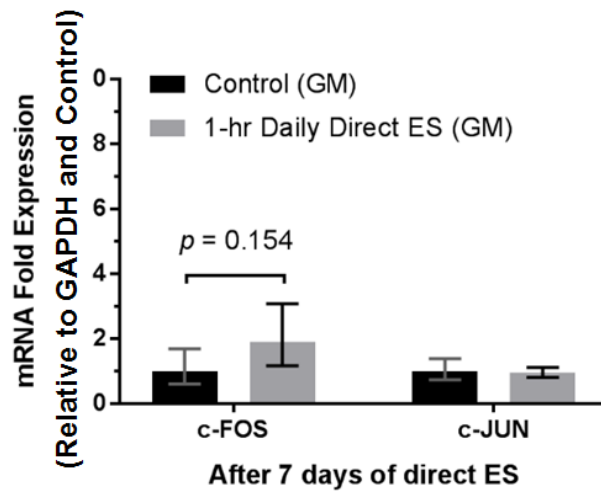

20

21 **Figure S2** c-FOS and c-JUN mRNA expressions after 7 days of 1-hour daily direct ES in growth media  
22 (GM). Error bars represent upper and lower 95% confidence limits ( $n = 3$  experiments). Statistical  
23 analyses were carried out using unpaired two-tailed Student's t-test.
